# Supplementary material for: Acaricidal Activity of Bufadienolides Isolated from Drimia pancration against Tetranychus urticae, and Structural Elucidation of Arenobufagin-3-O-α-L-rhamnopyranoside
Source: MDPI journal article supplement (doi:10.3390/plants11131629), 2022-06-21
Supplement: s1 [file s1]

Supplementary Materials

**Table S1.** Proton and carbon chemical shifts of compound **4** ( $\delta$  in ppm).

| Position    | $\delta_{\text{C}}^{\text{a}}$ | $\delta_{\text{H}}^{\text{a}}$ (J in Hz) |
|-------------|--------------------------------|------------------------------------------|
| 1 $\beta$   | 32.17                          | 1.23 (m)                                 |
| 1 $\alpha$  |                                | 1.62 (m)                                 |
| 2 $\alpha$  |                                | 1.18 (m)                                 |
| 2 $\beta$   | 26.70                          | 1.79 (m)                                 |
| 3 $\alpha$  |                                | 3.43 (m)                                 |
| 4 $\beta$   |                                | 1.30 (m)                                 |
| 4 $\alpha$  | 30.22                          | 1.62 (m)                                 |
| 5 $\beta$   |                                | 2.48 (dddd, 1.8, 1.8, 1.8, 1.8)          |
| 6 $\alpha$  |                                | 1.37 (m)                                 |
| 6 $\beta$   | 27.92                          | 1.79 (m)                                 |
| 7 $\alpha$  |                                | 1.18 (m)                                 |
| 7 $\beta$   |                                | 1.82 (m)                                 |
| 8           | 39.92                          | 1.68 (m)                                 |
| 9 $\alpha$  | 39.56                          | 1.71 (m)                                 |
| 10          | 36.80                          | -                                        |
| 11 $\alpha$ | 73.61                          | 4.24 (d, 11.2)                           |
| 12          | 213.73                         | -                                        |
| 13          | 62.48                          | -                                        |
| 14          | 84.51                          | -                                        |
| 15 $\beta$  | 32.74                          | 2.06 (m)                                 |
| 15 $\alpha$ |                                | 2.36 (m)                                 |
| 16 $\beta$  |                                | 1.60 (m)                                 |
| 16 $\alpha$ | 27.93                          | 1.83 (m)                                 |
| 17 $\alpha$ |                                | 3.94 (dd, 9.4, 7.0)                      |
| 18          |                                | 0.77 (s)                                 |
| 19          | 23.79                          | 1.04 (s)                                 |
| 20          | 121.29                         | -                                        |
| 21          | 150.47                         | 7.55 (dd, 2.5, 1.0)                      |
| 22          | 147.53                         | 7.79 (dd, 9.8, 2.5)                      |
| 23          | 114.89                         | 6.30 (dd, 9.8, 1.0)                      |
| 24          | 161.71                         | -                                        |
| 1'          | 98.44                          | 4.59 (d, 1.5)                            |
| 2'          | 71.48                          | 3.54 (m)                                 |
| 3'          | 71.83                          | 3.76 (m)                                 |
| 4'          | 72.35                          | 3.18 (dd, 9.0, 9.0)                      |
| 5'          | 68.89                          | 3.41 (m)                                 |
| 6'          | 18.13                          | 1.07 (d, 6.3)                            |

<sup>a</sup> (CD<sub>3</sub>)<sub>2</sub>SO (<sup>1</sup>H: 400 MHz; <sup>13</sup>C: 100 MHz).

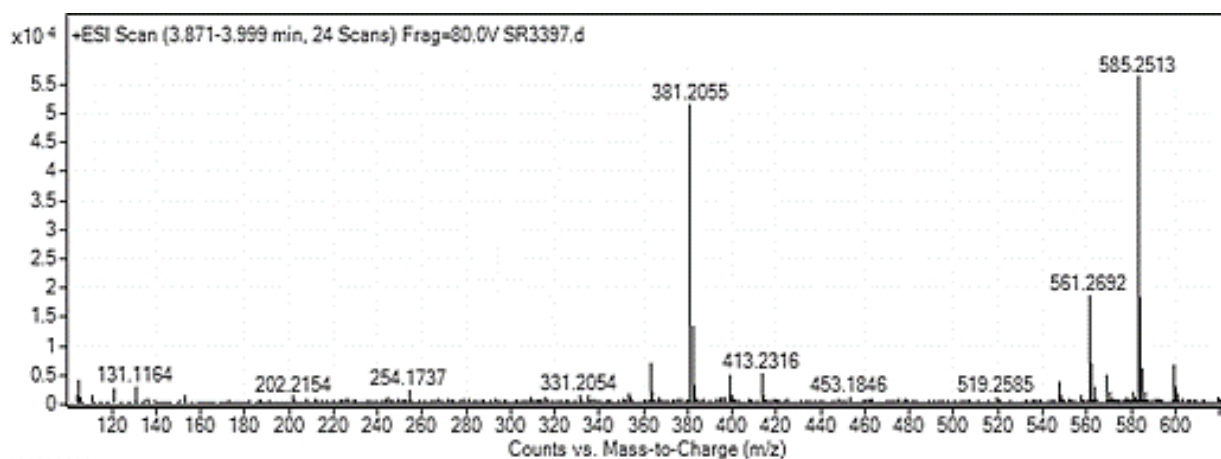

Figure S1. Mass spectrum of compound 4.

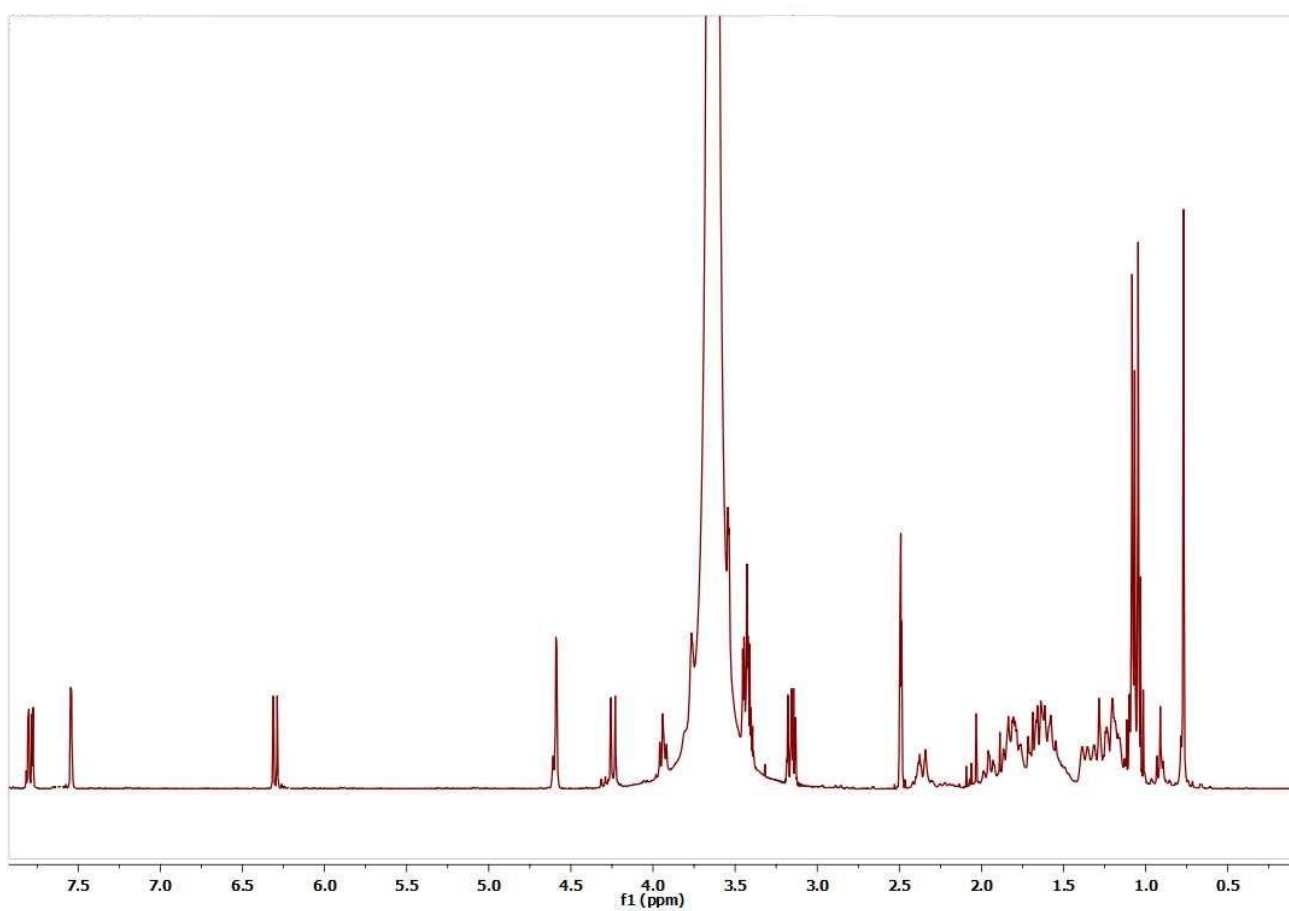

Figure S2.  $^1\text{H}$ -NMR spectrum of compound 4 ( $\delta$  in ppm).

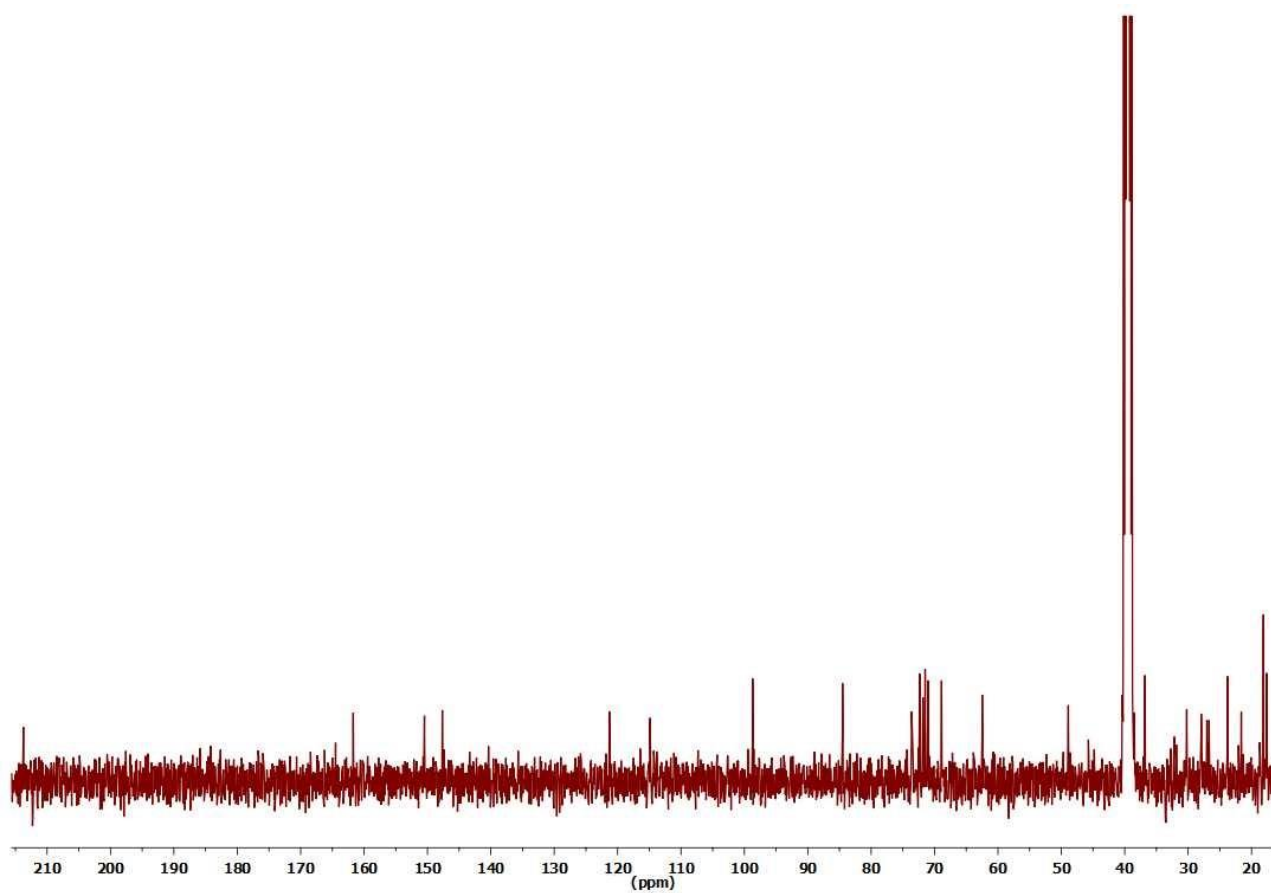

**Figure S3.**  $^{13}\text{C}$ -NMR spectrum of compound 4 ( $\delta$  in ppm).
